# Supplementary material
Source: PubMed Central journal article supplement (PMC11041655)
Supplement: 44161_2023_224_MOESM1_ESM.pdf [file 44161_2023_224_MOESM1_ESM.pdf]

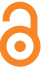

---

# The angiotensin receptor Tie2 is atheroprotective in arterial endothelium

---

In the format provided by the authors and unedited

| Supplementary Table 1: Primers used in the study |           |                                          |                                  |
|--------------------------------------------------|-----------|------------------------------------------|----------------------------------|
| Gene                                             | Primer ID | Sequence                                 | Purpose                          |
| Tie1                                             | v3393     | CATTGGACAGACAAGCATGG                     | Genotyping                       |
|                                                  | v3394     | CCACCAGACAGAACCACTCA                     | Genotyping and recombination     |
|                                                  | v3399     | TAAAGGGTCGTCACGCTCCTAATTT                | Recombination                    |
| Tie2(Tek)                                        | TEKI3     | CAGGCTATCACTGTGACACTGGTAC                | Genotyping                       |
|                                                  | SDL2      | AAATACGCAGTTTCAGGGCTGGGA                 | Genotyping and recombination     |
|                                                  | VERI      | ACCAATTCGGGGAATCCTATGGCA                 | Recombination                    |
| CRISPR deletion                                  | L1:       | GCAGGTTTAGTGAGCTCCAAGTTTTAGAGC<br>TATGCT | Crispr gRNA                      |
|                                                  | R1:       | GGAGTTGTAGCTTCCATACGGTTTTAGAGC<br>TATGCT | Crispr gRNA                      |
|                                                  | R2:       | AGTTGTACCTACAAGAAAGTGTTTAGAGCTATGCT      | Crispr gRNA                      |
| CRISPR-RNP deletion                              | Forward   | CCTTCCCTGTTGTGTGTTTC                     | CRISPR-RNP deletion confirmation |
|                                                  | Reverse   | CCGGCACAAGAATTACACTACC                   | CRISPR-RNP deletion confirmation |
| gRNA for rs1322052                               | gRNA      | GTATGGACTTAGCAACAGAA                     | gRNA for rs1322052               |
| TIE2(Tek)                                        | FH1_TEK:  | AAGACCTACGTGAATACCAC                     | gene expression confirmation     |
|                                                  | BH1_TEK:  | GAAACAGAGGGTATACAGATG                    |                                  |
| RPLP0                                            | H1_RPLP0  | AATCTCCAGGGGCACCATT                      | gene expression confirmation     |
|                                                  | BH1_RPLP0 | CGCTGGCTCCCACTTTGT                       |                                  |

Supplementary Table 2: Antibodies used in the study

| Target protein                  | Host    | Company                  | Cat. #     |
|---------------------------------|---------|--------------------------|------------|
| VCAM1                           | Goat    | R&D Systems              | AF643      |
| PECAM1                          | Rat     | BD Bioscience            | 553370     |
| TIE2 (TEK)                      | Goat    | R&D Systems              | AF762      |
| CD68                            | Rat     | Bio-Rad                  | MCA1957GA  |
| CD3e                            | Hamster | BD Bioscience            | 553058     |
| SEMAPHORIN 3C                   | Sheep   | R&D Systems              | AF1728     |
| CD140a(PDGFR $\alpha$ )         | Rat     | Thermo Fisher Scientific | 14-1401-81 |
| Tie2-PE                         | Rat     | Biolegned                | 124007     |
| CD31-FITC                       | Rat     | BD Bioscience            | 553370     |
| PDGFR $\alpha$ -PE-Cy7          | Rat     | eBioscience              | 25-1401-81 |
| CD45-Pacific Blue               | Rat     | Biolegned                | 103125     |
| Ter119-Pacific Blue             | Rat     | Biolegned                | 116231     |
| CD16/32 (Fc Block)              | Rat     | BD Bioscience            | 553141     |
| B220-FITC                       | Rat     | BD Bioscience            | 553088     |
| CD3e-APC-eFluor780              | Rat     | eBioscience              | 47-0031    |
| CD11b-PE-Cy7                    | Rat     | eBioscience              | 25-0112    |
| PE-CF594 anti mouse CD13        | Rat     | BD Bioscience            | 562537     |
| Alexa 700 anti mouse CD127      | Rat     | eBioscience              | 56-1271-82 |
| PerCP anti mouse CD45           | Rat     | BD Bioscience            | 557235     |
| BV510 anti mouse CD11b          | Rat     | Biolegend                | 101263     |
| PE anti mouse Gr1               | Rat     | eBioscience              | 12-5931-81 |
| PE-Cy7 anti mouse F4/80         | Rat     | Biolegend                | 123114     |
| APC anti mouse Fc Receptor      | Rat     | eBioscience              | 17-0161-81 |
| eFluor450 anti mouse CD3e       | Rat     | eBioscience              | 48-0032    |
| eFluor450 anti mouse B220       | Rat     | eBioscience              | 48-0452    |
| eFluor450 anti mouse Gr1        | Rat     | eBioscience              | 48-5931    |
| eFluor450 anti mouse CD11b      | Rat     | eBioscience              | 48-0112    |
| PE anti mouse Sca-1             | Rat     | BD Bioscience            | 553108     |
| PE-Cy7 anti mouse ckit          | Rat     | BD Bioscience            | 558163     |
| Alexa Fluor 647 anti mouse CD34 | Rat     | BD Bioscience            | 560230     |
| PE-CF594 anti mouse CD135       | Rat     | BD Bioscience            | 562537     |
| Alexa 700 anti mouse CD127      | Rat     | eBioscience              | 56-1271-82 |

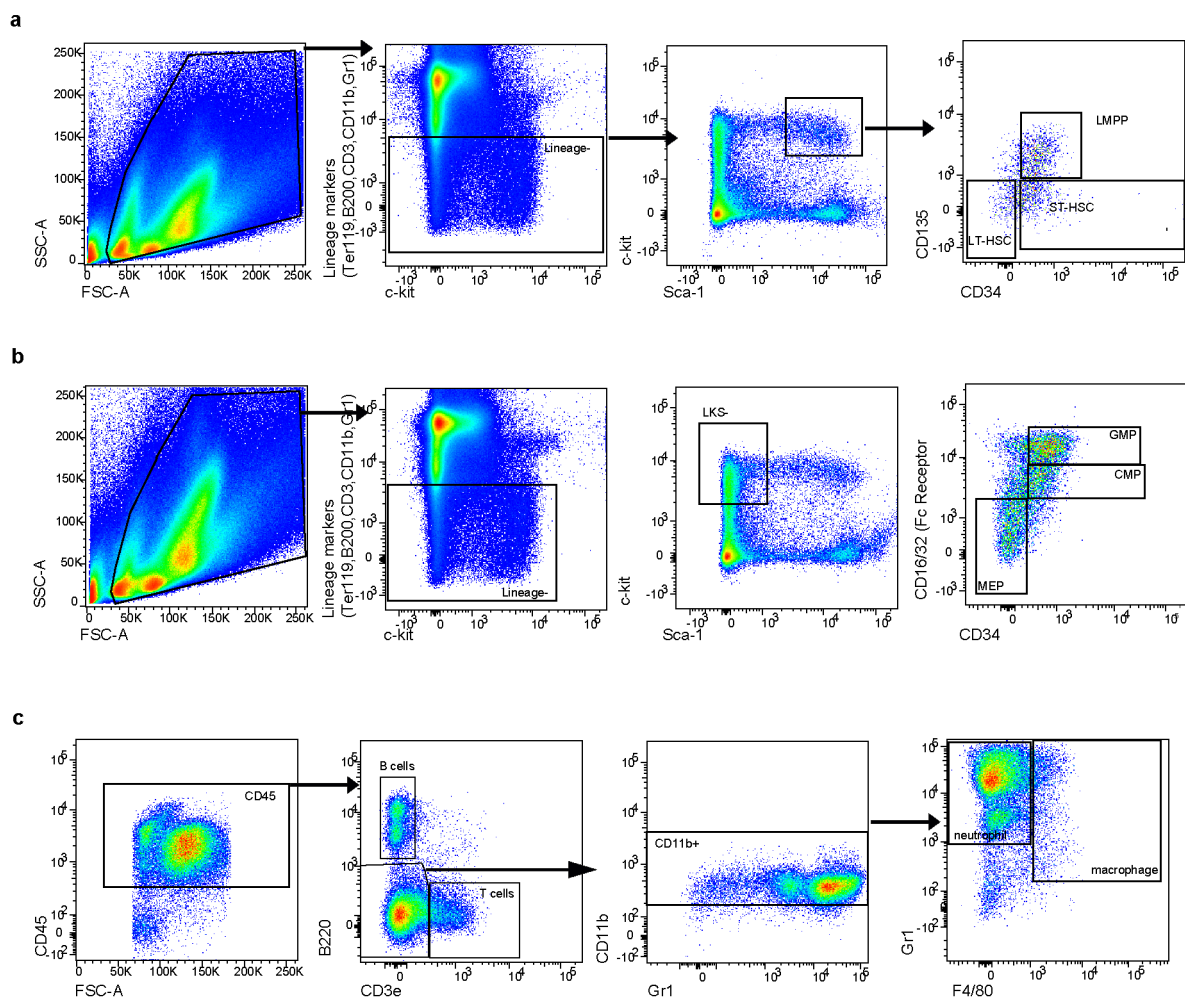

**Supplementary Fig. 1 Gating strategy. a-c.** Representative flow cytometry analysis with gating strategy on the hematopoietic stem and progenitor cells and mature immune cells.
